# Supplementary material
Source: PubMed Central journal article supplement (PMC6764754)
Supplement: NIHMS1007242-supplement-ESI.pdf [file NIHMS1007242-supplement-ESI.pdf]

**Supporting Information for:**

**Ultrasensitive Multi-Species Detection of CRISPR-Cas9 by a Portable Centrifugal Microfluidic Platform**

Christopher R. Phaneuf<sup>1#\*</sup>, Kyle J. Seamon<sup>2\$\*</sup>, Tyler P. Eckles<sup>1</sup>, Anchal Sinha<sup>1&</sup>, Joseph S. Schoeniger<sup>2</sup>, Brooke Harmon<sup>2</sup>, Robert J. Meagher<sup>1</sup>, Vinay Abhyankar<sup>3</sup>, Chung-Yan Koh<sup>1†</sup>

<sup>1</sup>Biotechnology and Bioengineering, Sandia National Laboratories, Livermore, CA 94550, USA

<sup>2</sup>Systems Biology, Sandia National Laboratories, Livermore, CA 94550, USA

<sup>3</sup>Department of Biomedical Engineering, Rochester Institute of Technology, Rochester, NY 14627, USA

\*These authors contributed equally to this work

#Currently at Illumina, Inc., San Diego, CA 92122

\$Currently at Inscripta, Inc., Pleasanton, CA 94566

&Currently at Department of Electrical and Computer Engineering, University of California Los Angeles, Los Angeles, CA 90095, USA

†To whom correspondence should be addressed: ckoh@sandia.gov, +1-925-294-2845

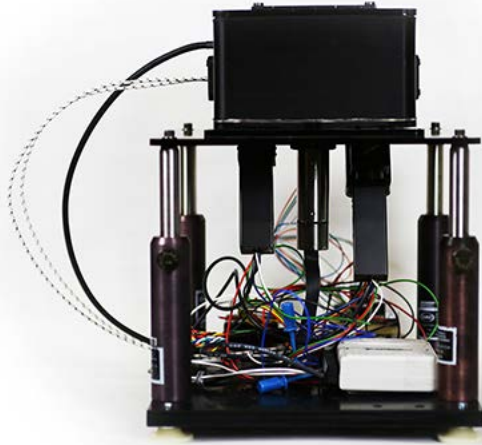

**Figure S1. Photograph of centrifugal microfluidic platform.**

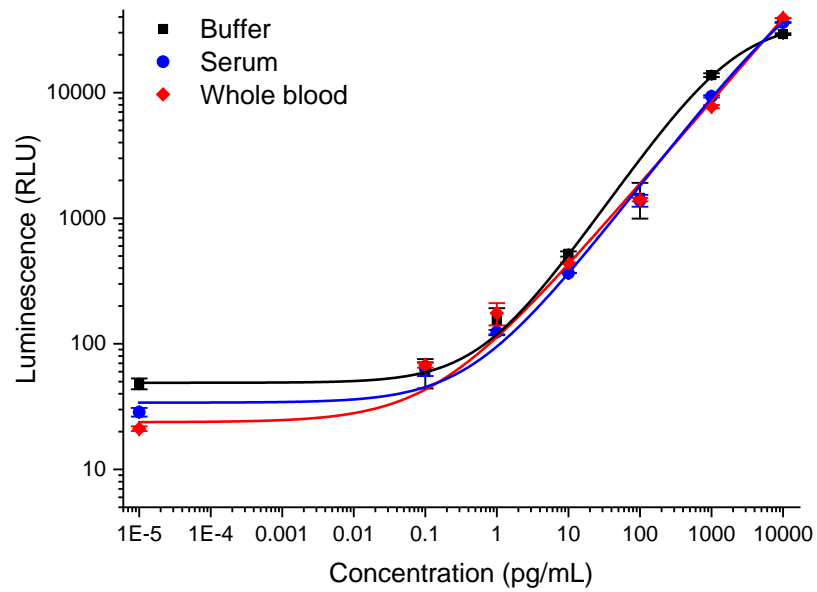

**Figure S2. Detection of *N. meningitidis* Cas9 by AcrIIC1 in biological matrices.** Silica microparticles were functionalized with AcrIIC1 capture reagent and Cas9 in buffer, serum, or whole blood was measured by luminescence from specific detection antibodies.

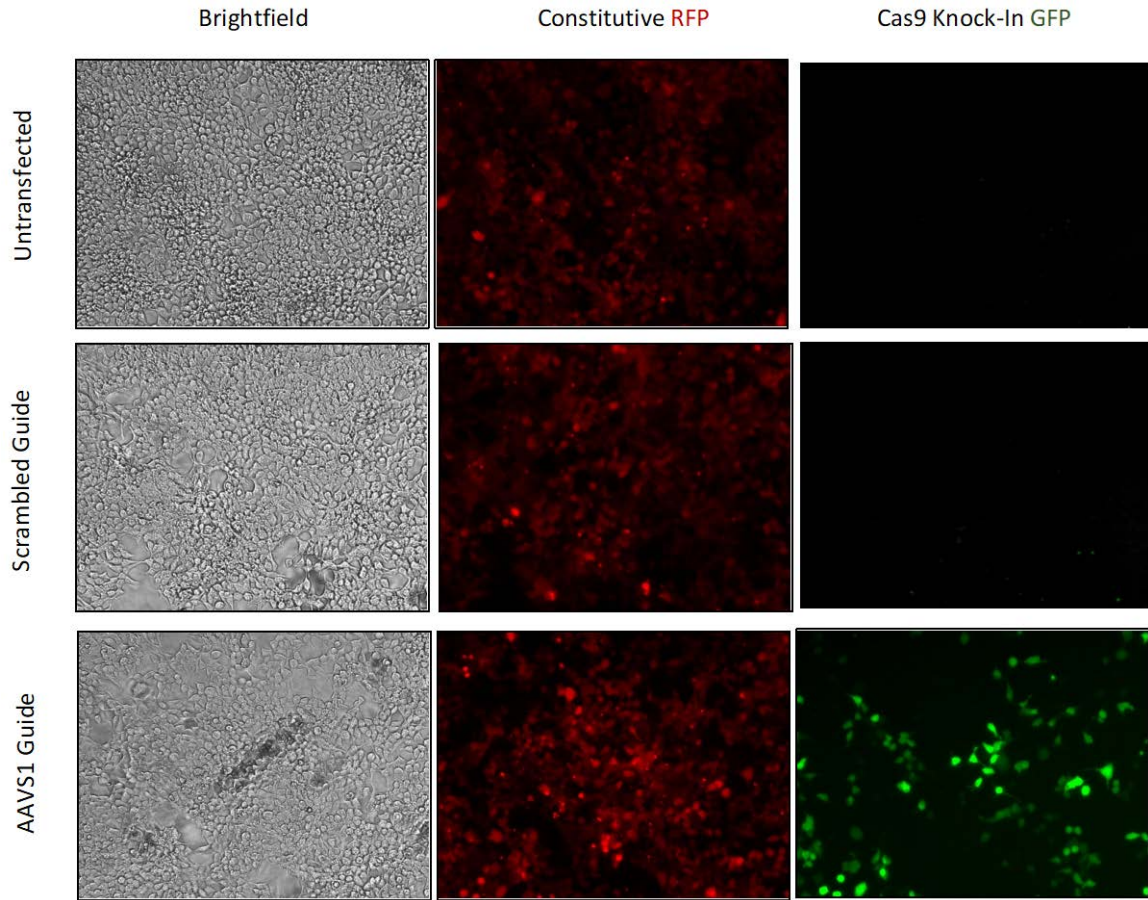

**Figure S3. Microscopy of untransfected, scrambled guide-transfected, or on target-transfected guide cells.** HEK293T cells with an integrated constitutive RFP and knock-in GFP reporter were transfected with plasmid encoding Cas9 and either an off-target scrambled guide or an on-target AAVS1 guide. 96 hours after transfection, cells were imaged by standard epifluorescence microscopy. These cells are from the same experiment as those that were analyzed in the main text, Fig. 3b.
